# Supplementary material
Source: PubMed Central journal article supplement (PMC2829628)
Supplement: 275892.f1.pdf [file 275892.f1.pdf]

**Table 1**

| Cell type studied          | antibody                          | technique | MW      | Reference                                                                |
|----------------------------|-----------------------------------|-----------|---------|--------------------------------------------------------------------------|
| L929sA                     | non-commercial (Dr.Cohen, Dundee) | IF, ChIP  | NA      | Vermeulen L et al (2003) <i>Embo J</i> 22: 1313-1324.                    |
| KBM-5                      | Rockland #100-401-264             | WB        | ?       | Takada Y et al (2004) <i>J Biol Chem</i> 279: 15096-15104.               |
| melanoma                   | CS #3037                          | WB        | ?       | Kuphal S et al (2004) <i>Oncogene</i> 23: 8509-8519.                     |
| MDA-MB-231                 | CS #3037                          | WB        | ?       | Ho WC et al (2005). <i>Cancer Res</i> 65: 4273-4281.                     |
| MEFs                       | Abcam #ab30623                    | WB        | ?       | Jacque E et al (2005). <i>Proc Natl Acad Sci U S A</i> 102: 14635-14640. |
| Hela, 293T                 | ?                                 | WB, ChIP  | ?       | Chen LF et al (2005) <i>Mol Cell Biol</i> 25: 7966-7975.                 |
| liver                      | CS #3037                          | IHC       | NA      | Mackay H et al (2005) <i>Clin Cancer Res</i> 11: 5526-5533.              |
| muscle                     | CS #3037                          | IHC       | NA      | Messina S et al (2006) <i>Am J Pathol</i> 168: 918-926.                  |
| Raw274.7                   | CS #3037                          | WB        | ?       | Chen BC et al (2006) <i>J Immunol</i> 177: 681-693.                      |
| CV-1                       | CS #3037                          | WB        | ?       | Hargett D et al (2006) <i>J Virol</i> 80: 10565-10578.                   |
| C2C12                      | CS #3037                          | WB        | ?       | Kefaloyianni E et al (2006) <i>Cell Signal</i> 18: 2238-2251.            |
| L929sA                     | CS #3037                          | WB        | 130 kDa | Vanden Berghe W et al (2006) <i>Cancer Res</i> 66: 4852-4862.            |
| retina                     | CS #3037                          | WB        | ?       | Miki K et al (2007) <i>Exp Eye Res</i> 84: 285-292.                      |
| chondrocytes               | CS #3037                          | WB        | ?       | Dossumbekova A et al (2007) <i>Arthritis Rheum</i> 56: 3284-3296.        |
| synovial fibroblasts       | CS #3037                          | WB        | ?       | Tang et al (2007) <i>J Immunol</i> 179: 5483-5492.                       |
| lung, HUVEC                | CS #3037                          | WB        | ?       | Gorska MM et al (2007) <i>J Exp Med</i> 204: 1637-1652.                  |
| Hela                       | CS #3037                          | WB        | ?       | Horion J et al (2007) <i>J Biol Chem</i> 282: 15383-15393.               |
| chondrocytes               | CS #3037                          | WB        | ?       | Hsu HC et al (2007) <i>Cell Signal</i> 19: 2317-2328.                    |
| U937                       | CS #3031?                         | WB, ChIP  | ?       | Jamaluddin M et al (2007) <i>Cell Signal</i> 19: 1419-1433.              |
| BEAS-2B                    | Chemicon #AB3375                  | WB        | ?       | Kim YM et al (2007) <i>Cell Signal</i> 19: 538-546.                      |
| skin                       | CS #3037                          | WB        | ?       | Lee JC et al (2007) <i>Carcinogenesis</i> 28: 1491-1498.                 |
| A549                       | CS #3037                          | WB        | ?       | Liu P et al (2007) <i>J Virol</i> 81: 1401-1411.                         |
| K562                       | CS #3037                          | WB        | ?       | Oh SM et al (2007) <i>J Immunol</i> 179: 5686-5692.                      |
| Raw264.7                   | CS #3037                          | WB        | ?       | Olson CM et al (2007) <i>Infect Immun</i> 75: 270-277.                   |
| keratinocytes              | ?                                 | WB        | ?       | Otkjaer K et al (2007) <i>J Invest Dermatol</i> 127: 1326-1336.          |
| HUVEC                      | CS #3037                          | WB        | ?       | Partridge J et al (2007) <i>Faseb J</i> 21: 3553-3561.                   |
| astrocytes                 | Abcam #ab30623                    | WB, IF    | ?       | Saha RN et al (2007) <i>J Immunol</i> 179: 7101-7109.                    |
| A549                       | CS #3037                          | WB        | 130 kDa | Beck IM et al (2008) <i>Embo J</i> 27: 1682-1693.                        |
| airway smooth muscle cells | CS #3037                          | WB        | ?       | Clarke DL et al. (2008) <i>J Immunol</i> 181: 3503-3514.                 |

|                                    |             |          |           |                                                                                          |
|------------------------------------|-------------|----------|-----------|------------------------------------------------------------------------------------------|
| <b>mononuclear cells</b>           | CS #3037    | WB       | ?         | Deree J <i>et al</i> (2008) <i>Clinics</i> 63: 321-328.                                  |
| <b>U266, L363</b>                  | CS #3037    | WB       | 80 kDa    | Gerlo S <i>et al</i> (2008) <i>Cell Signal</i> 20: 1489-1496.                            |
| <b>Ad5</b>                         | CS #3037    | WB       | ?         | Guan H <i>et al</i> (2008) <i>J Virol</i> 82: 40-48.                                     |
| <b>osteoblasts</b>                 | CS #3037    | WB       | ?         | Hou CH <i>et al</i> (2008) <i>Cell Signal</i> 20: 978-988.                               |
| <b>MEFs</b>                        | CS #3037    | WB       | ?         | Laszlo CF <i>et al</i> (2008) <i>Photochem Photobiol</i> 84: 1564-1568.                  |
| <b>Hela</b>                        | Santa Cruz? | WB, ChIP | 80 kDa    | Nowak DE <i>et al</i> (2008) <i>Mol Cell Biol</i> 28: 3623-3638.                         |
| <b>glioma</b>                      | CS #3037    | WB, IF   | ?         | Nozell S <i>et al</i> (2008) <i>Mol Cell Biol</i> 28: 6632-6645.                         |
| <b>intestinal epithelial cells</b> | CS #3037    | WB, IHC  | ?         | Onizawa M <i>et al</i> (2009) <i>Am J Physiol Gastrointest Liver Physiol</i> 296:G850-9. |
| <b>Hela</b>                        | CS #3037    | WB       | ?         | Ishinaga H <i>et al</i> (2009) <i>Biochem J</i> 417: 583-591.                            |
| <b>Raw264.7</b>                    | CS #3037    | WB       | ?         | Wijayanti N <i>et al</i> (2008) <i>Free Radic Biol Med</i> 44: 699-710.                  |
| <b>Hela</b>                        | CS #3037    | WB       | ?         | Williams LM <i>et al</i> (2008) <i>Mol Immunol</i> 45: 2446-2454.                        |
| <b>Schwann cells</b>               | CS #3037    | WB       | ?         | Yoon C <i>et al</i> (2008) <i>J Neurosci</i> 28: 3738-3746.                              |
| <b>Raw264.7</b>                    | CS #3037    | WB       | ?         | Furusawa J <i>et al</i> (2009) <i>Cell Signal</i> 21: 778-785.                           |
| <b>Raw264.7</b>                    | CS #3037    | WB       | ?         | Furusawa J <i>et al</i> (2009) <i>Int Immunopharmacol</i> 9: 499-507.                    |
| <b>bone marrow neutrophils</b>     | CS #3037    | WB       | ?         | Lorne E <i>et al</i> (2009) <i>Am J Respir Cell Mol Biol</i> . [Epub ahead of print]     |
| <b>lung fibroblasts</b>            | CS #3037    | WB       | 70-80 kDa | Reber L <i>et al</i> (2009) <i>PLoS ONE</i> 4: e4393.                                    |

*Suppl. table 1. Summary of reports that have used phospho-specific antibodies to show phosphorylation of p65 at the Ser276 residue.*

In the table the cell types in which p65 phosphorylation was investigated, and the antibody-based techniques used to study p65 phosphorylation, are indicated. All corresponding authors were contacted via E-mail and where available, information (from these personal communications) on the MW of the immunoreactive band shown on anti-P-p65 Ser276 Western Blots in the paper is indicated. (NA: not applicable, CS: Cell Signaling, WB: Western Blot, IF: immunofluo, IHC: immunohistochemistry, ChIP: chromatin immunoprecipitation).

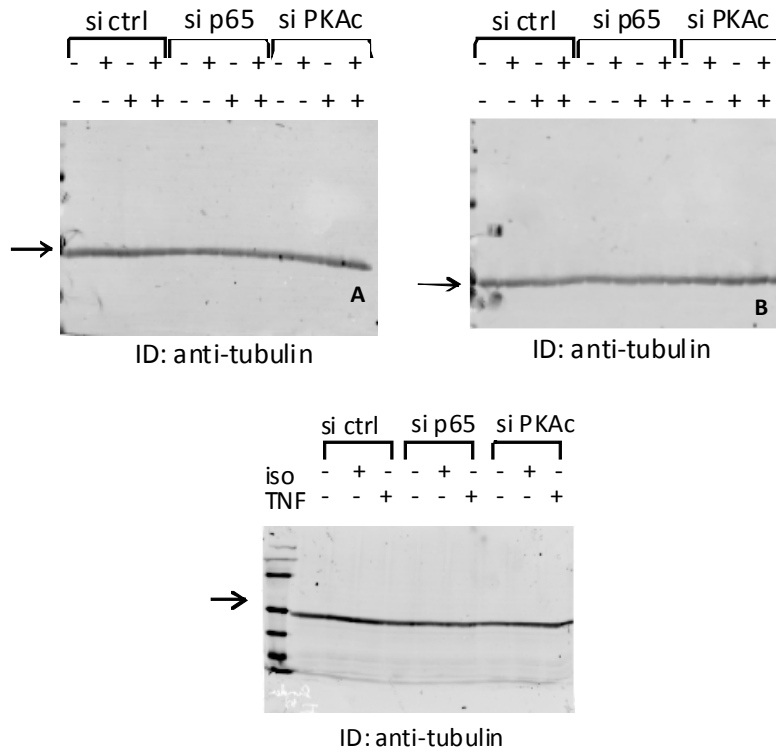

*Suppl. Fig. 1. Tubulin loading controls to Fig. 3.*

Presence of tubulin in cell lysates was analysed by Western Blot. After anti-p65 + anti-PKAc detection (Fig. 3, A2, B2, C2), blots were reprobed with anti-tubulin to assess equal protein loading.

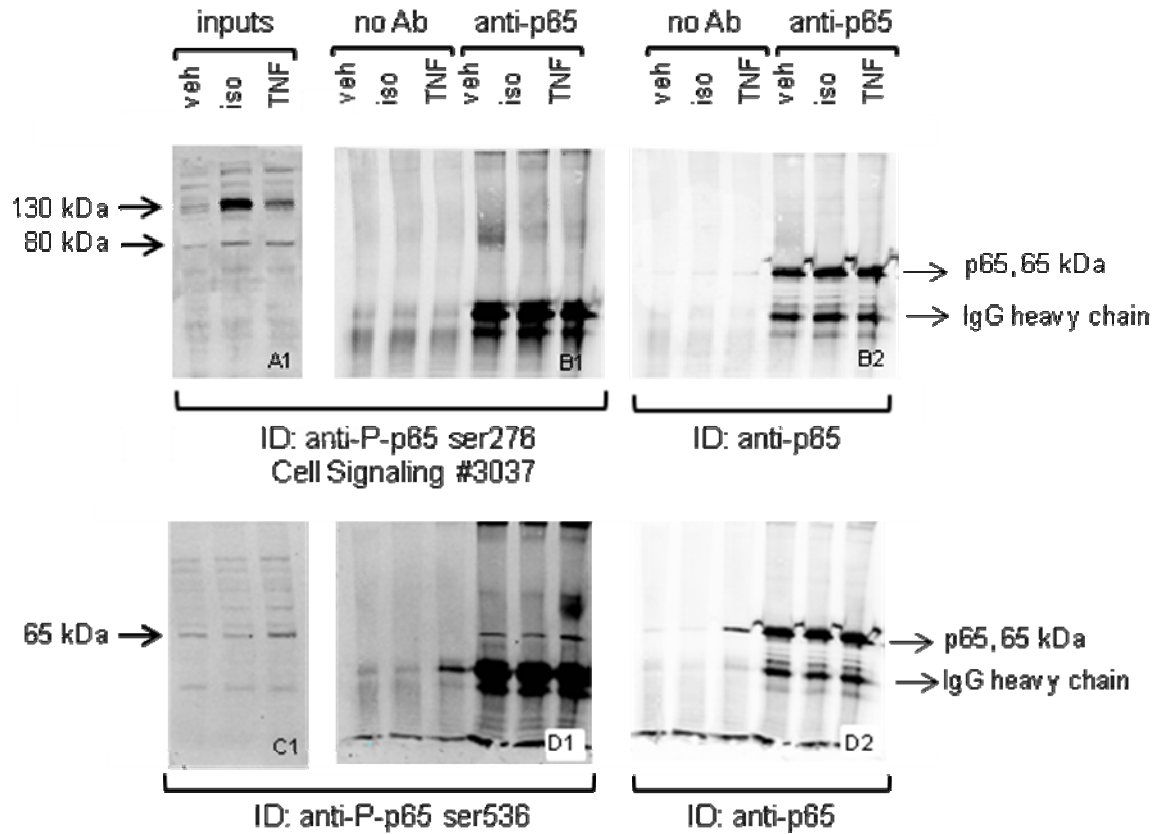

*Suppl. Fig. 2. Anti-P-p65 Ser276 is not detectable in p65-enriched immunoprecipitates.*

1321N1 cells were induced for 30 minutes with vehicle, isoproterenol (iso) or TNF. A. Cell lysates were subjected to immunoprecipitation with beads or anti-p65 (p65 C20). Presence of anti-P-p65 Ser276 immunoreactivities in inputs (A1) and immunoprecipitates (B1) was investigated by Western Blotting using Cell Signaling #3037 (A1, B1). Presence of anti-P-p65 Ser536 in the same inputs (C1) and immunoprecipitates (D1) was investigated by Western Blotting using anti-P-p65 Ser536. Blots B1 and D1 were washed extensively and reprobed with anti-p65 (B2, D2).

IP protocol: Briefly, cells ( $2 \times 10^6$  cells per 10 cm dish) were scraped and lysed in 500  $\mu$ l RIPA lysis buffer (150 mM NaCl, 50 mM Tris HCl pH 7,5, 1% NP40, 0,01% SDS, 1 mM EDTA, 1 mM EGTA, 0,5% sodium deoxycholate) supplemented with leupeptine,  $\beta$ -glycerophosphate, Aprotinin, Pefabloc, sodium fluoride and sodium orthovanadate. After 1h of rotation, lysates were centrifuged at 14000 rpm for 10 min and supernatant was used for immunoprecipitation. 30  $\mu$ l of supernatant was isolated before immunoprecipitation and used as input control. After 2 hours of incubation with antibody, 20  $\mu$ l of A-Beads was added and lysates were rotated overnight. Subsequently beads were washed 3 times with 1 ml of RIPA buffer supplemented with inhibitors. Samples were denatured in 20  $\mu$ l of RIPA, 25  $\mu$ l of 2 $\times$  Laemmli buffer and 2,5  $\mu$ l of 1M DTT for 10 min at 95°C and used for western blotting as described in materials and methods.

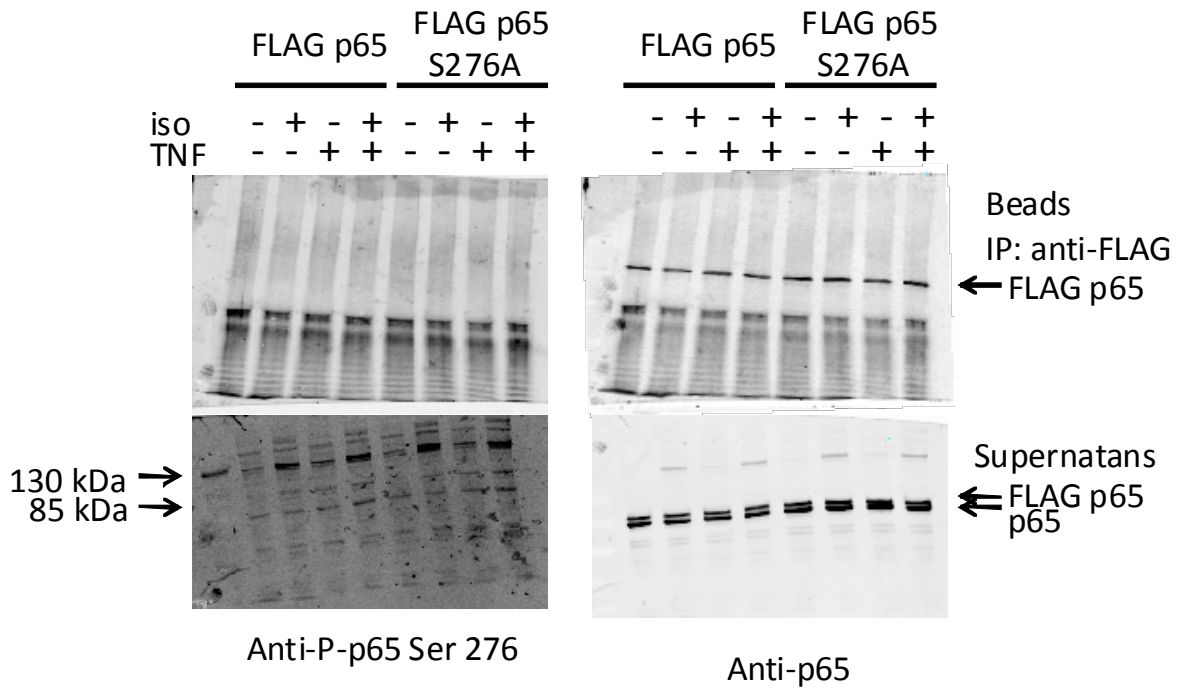

*Suppl. Fig. 3. Immunoprecipitation of overexpressed wild type FLAG p65 or FLAG p65 S276A mutant does not lead to recovery of the 130 kDa or 80 kDa immunoreactive bands. 1321N1 cells were induced for 30 minutes with vehicle, isoproterenol (iso) or TNF. A. Cell lysates were subjected to immunoprecipitation with anti-FLAG beads. Presence of anti-P-p65 Ser276 immunoreactivities in inputs (bottom panels) and immunoprecipitates (top panels) was investigated by Western Blotting using Cell Signaling #3037. Blots were washed extensively and reprobred with anti-p65. IP protocol was the same as in Suppl. Fig. 2.*
